# Supplementary material for: Megalin Orchestrates FcRn Endocytosis and Trafficking
Source: MDPI journal article supplement (doi:10.3390/cells12010053), 2022-12-22
Supplement: s1 [file s1]

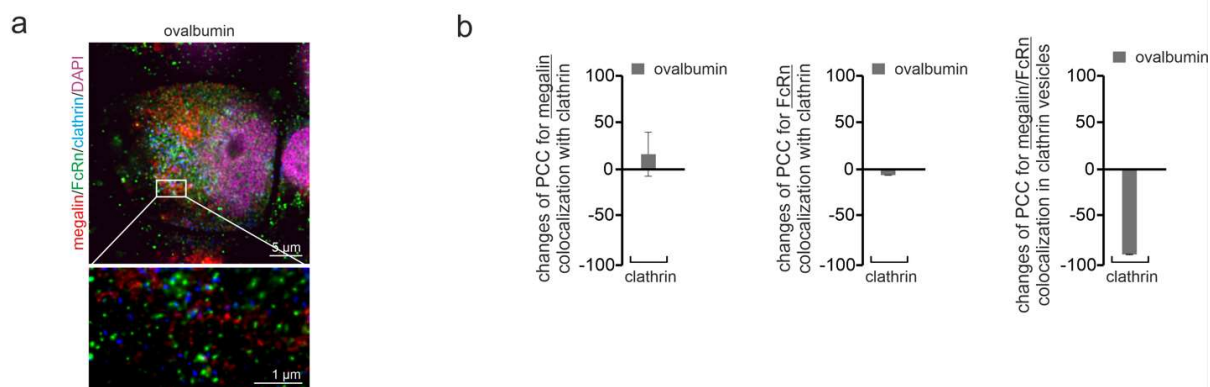

**Figure S1. Ovalbumin does not induce a colocalisation of megalin and FcRn in clathrin vesicles.** (a) Quadriple staining of FcRn, megalin, clathrin for clathrin vesicles, and DAPI for nuclei of OKC after incubation with 0.25 mg/ml ovalbumin for 5 min. Higher resolution STED images of inset are shown below. Magnification scale bar = 5  $\mu$ m and 1  $\mu$ m as indicated. (b) Relative changes in colocalization of megalin with clathrin, FcRn with clathrin and megalin and FcRn in clathrin vesicles using Pearson correlation coefficient. >80 cells of n = 2 independent experiments.

blot in Figure 2 b

samples were deglycosylated

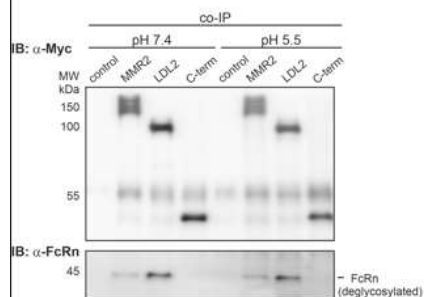

original data for Figure 2 b

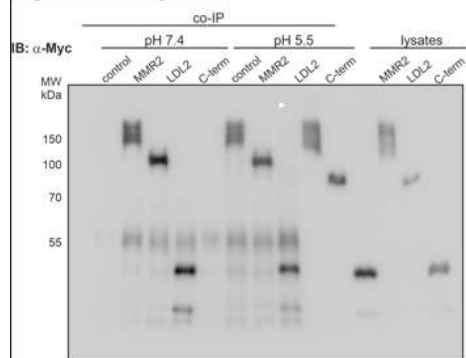

original data for Figure 2 b

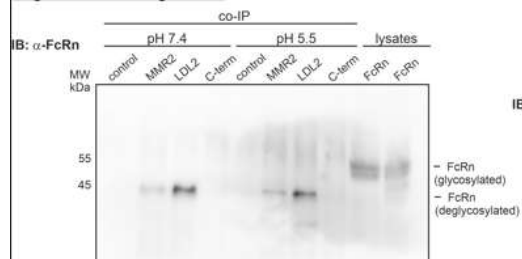

another example of Co-IP experiments shown in Figure 2 b

samples were *not* deglycosylated

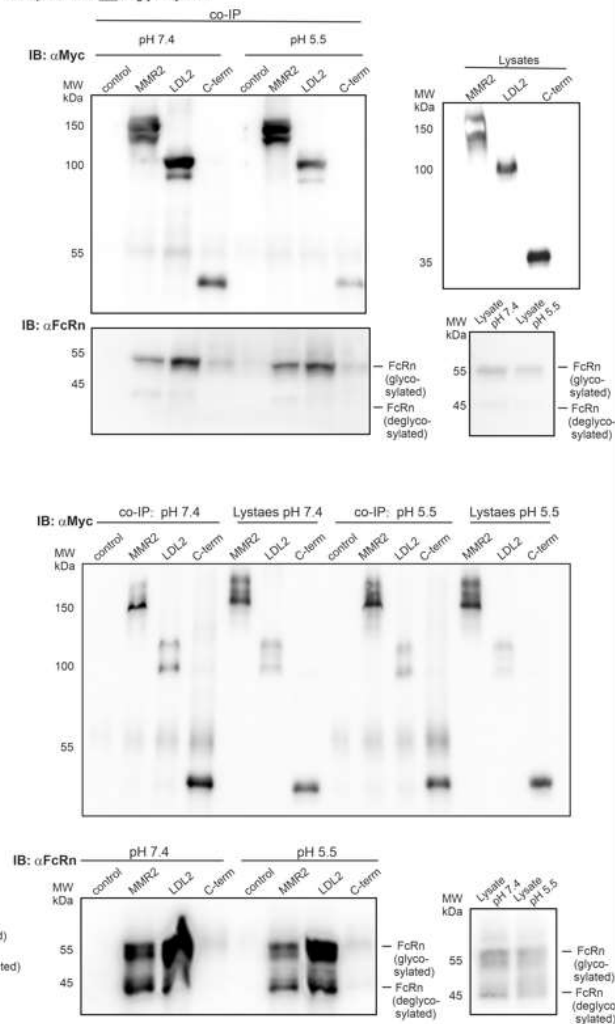

blot in Figure 2 c

samples were *not* deglycosylated

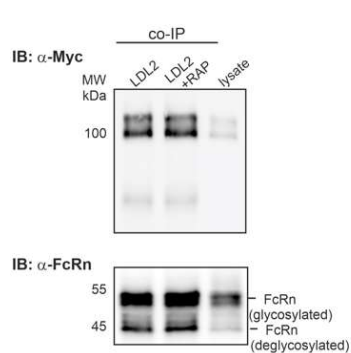

original data for blot shown in Figure 2 c

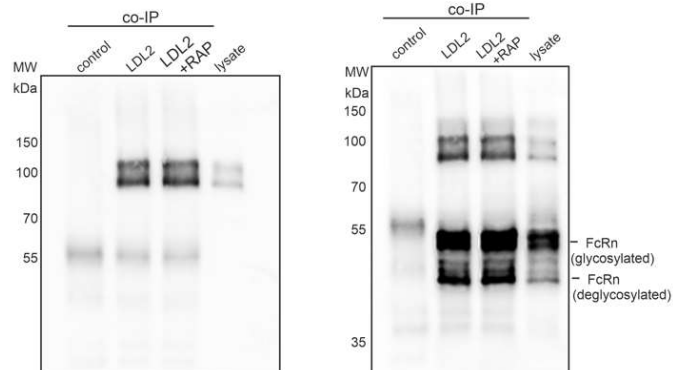

Figure S2. Original blots to Figure 2 and supportive data.

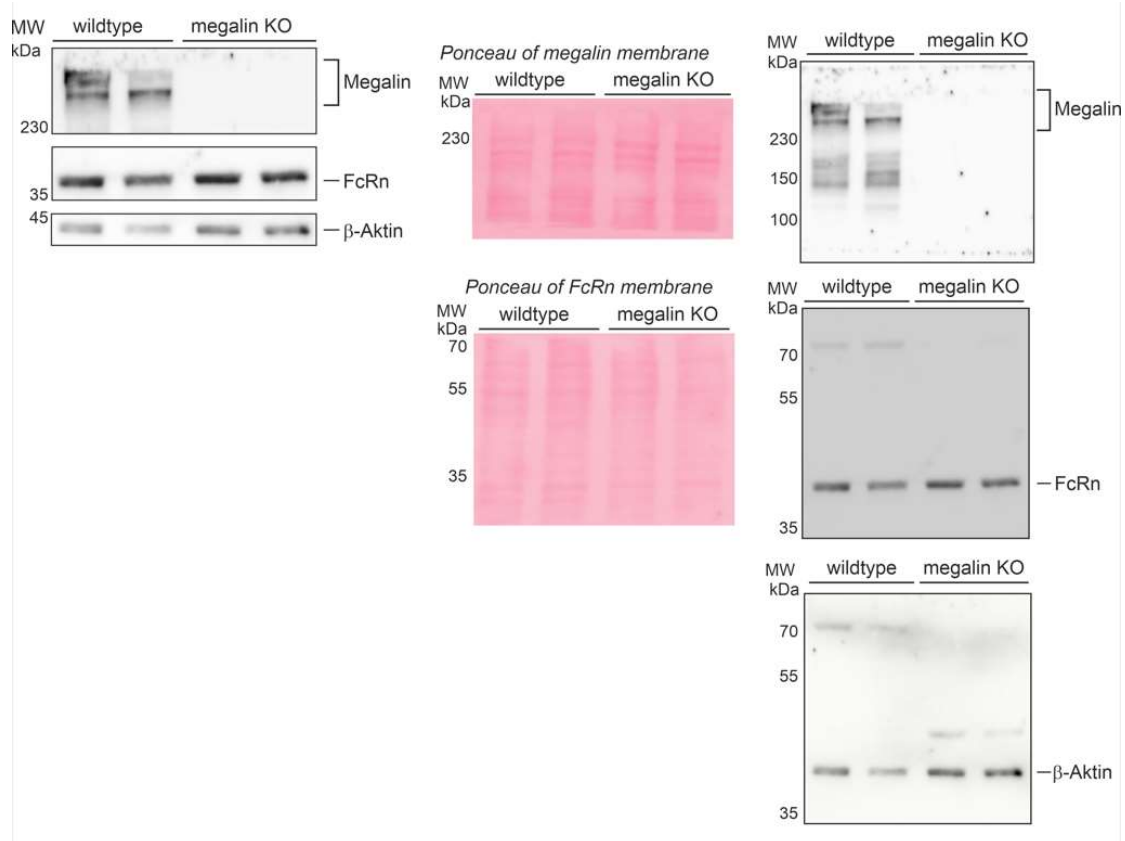

**Figure S3.** Original blots to Figure 4.
